# Supplementary material for: Identification of NRF2 Activation as a Prognostic Biomarker in T-Cell Acute Lymphoblastic Leukaemia
Source: MDPI journal article supplement (doi:10.3390/ijms241210350), 2023-06-19
Supplement: s1 [file s1]

**SUPPLEMENTARY TABLES AND FIGURES**

**Supplementary Table S1. List of statistically significant gene sets identified by Gene Set Enrichment Analysis (GSEA).** Details on the patients and type of analysis, the number of genes (size) of each gene set and the enrichment values are indicated. ES, enrichment score. NES, normalized enrichment score. NOM, nominal. FDR, false discovery rate.

| COHORT                                        | TYPE OF ANALYSIS                                              | BIOLOGICAL PROCESS                                                       | STANDARD NAME IN MSigDB                                               | SIZE       | ES          | NES         | NOM p-val    | FDR q-val    |
|-----------------------------------------------|---------------------------------------------------------------|--------------------------------------------------------------------------|-----------------------------------------------------------------------|------------|-------------|-------------|--------------|--------------|
| T-ALL cohort described in [32]                | NFE2L2 expression as a continuous variable                    | NRF2-signalling                                                          | IBRAHIM_NRF2_UP                                                       | 232        | 0.53317404  | 1.8626792   | 0.0          | 0.0047281324 |
|                                               |                                                               |                                                                          | WP_NRF2ARE_REGULATION                                                 | 19         | 0.5735497   | 1.6477796   | 0.00984252   | 0.024935974  |
|                                               |                                                               |                                                                          | REACTOME_KEAP1_NFE2L2_PATHWAY                                         | 78         | 0.5981252   | 1.7403532   | 0.015841585  | 0.016597716  |
|                                               |                                                               |                                                                          | REACTOME_NUCLEAR_EVENTS_MEDIATED_BY_NFE2L2                            | 65         | 0.6006875   | 1.7091892   | 0.02385686   | 0.017106641  |
|                                               |                                                               | "HALLMARKS" module (MSigDB)                                              | HALLMARK_PROTEIN_SECRETION                                            | 62         | 0.5653247   | 1.8345639   | 0.0          | 0.09958092   |
|                                               |                                                               |                                                                          | HALLMARK_PI3K_AKT_MTOR_SIGNALING                                      | 74         | 0.45077482  | 1.6486194   | 0.00589391   | 0.18221839   |
|                                               |                                                               |                                                                          | HALLMARK_APOPTOSIS                                                    | 132        | 0.44342795  | 1.7128903   | 0.008048289  | 0.15528475   |
|                                               |                                                               |                                                                          | HALLMARK_P53_PATHWAY                                                  | 107        | 0.3945797   | 1.5899252   | 0.014583333  | 0.1719766    |
|                                               |                                                               |                                                                          | HALLMARK_COMPLEMENT                                                   | 151        | 0.37861565  | 1.5461987   | 0.02964427   | 0.14310727   |
|                                               |                                                               |                                                                          | HALLMARK_UV_RESPONSE_UP                                               | 129        | 0.34755042  | 1.4482782   | 0.034862384  | 0.15014628   |
|                                               |                                                               |                                                                          | HALLMARK_ANDROGEN_RESPONSE                                            | 63         | 0.38719532  | 1.4868444   | 0.036190476  | 0.12407464   |
|                                               |                                                               |                                                                          | HALLMARK_ALLOGRAFT_REJECTION                                          | 163        | 0.42897388  | 1.6484371   | 0.036437247  | 0.1366638    |
|                                               |                                                               |                                                                          | HALLMARK_XENOBIOTIC_METABOLISM                                        | 147        | 0.32749376  | 1.4100819   | 0.042168673  | 0.1400223    |
|                                               |                                                               |                                                                          | HALLMARK_HYPOXIA                                                      | 133        | 0.34169656  | 1.4197465   | 0.042990655  | 0.1570905    |
|                                               |                                                               |                                                                          | HALLMARK_IL2_STAT5_SIGNALING                                          | 128        | 0.3887383   | 1.5210602   | 0.04347826   | 0.12652451   |
|                                               |                                                               |                                                                          | HALLMARK_MTORC1_SIGNALING                                             | 139        | 0.465061    | 1.5441027   | 0.049079753  | 0.12886308   |
|                                               |                                                               |                                                                          | HALLMARK_REACTIVE_OXYGEN_SPECIES_PATHWAY                              | 35         | 0.49109906  | 1.5158067   | 0.04935863   | 0.1209114    |
|                                               |                                                               | "PI3K-AKT-MTOR" and "MAPK" signatures selected from "C2" module (MSigDB) | PARENT_MTOR_SIGNALING_UP                                              | 277        | 0.37444335  | 1.6406112   | 0.0020325202 | 0.007790798  |
|                                               |                                                               |                                                                          | KEGG_MTOR_SIGNALING_PATHWAY                                           | 28         | 0.5441033   | 1.7170228   | 0.0038240917 | 0.0047743064 |
|                                               |                                                               |                                                                          | BIOCARTA_MAPK_PATHWAY                                                 | 58         | 0.49348474  | 1.7219363   | 0.003992016  | 0.0071614594 |
|                                               | REACTOME_MAPK_FAMILY_SIGNALING_CASCADES                       |                                                                          | 207                                                                   | 0.43142    | 1.682271    | 0.005988024 | 0.007134331  |              |
|                                               | "Glutathione" signatures selected from MSigDB                 | GOBP_GLUTATHIONE_METABOLIC_PROCESS                                       | 28                                                                    | 0.52879226 | 1.632531    | 0.031578947 | 0.15759353   |              |
|                                               |                                                               | TOOKER_GEMCITABINE_RESISTANCE_DN                                         | 73                                                                    | 0.4613966  | 1.6166724   | 0.007889546 | 0.13441806   |              |
|                                               | "Drug resistance" signatures (MSigDB)                         | WP_EGFR_TYROSINE_KINASE_INHIBITOR_RESISTANCE                             | 64                                                                    | 0.41430157 | 1.5669923   | 0.01778656  | 0.12601322   |              |
|                                               |                                                               | TOOKER_GEMCITABINE_RESISTANCE_UP                                         | 50                                                                    | 0.5300307  | 1.7250205   | 0.022177419 | 0.12857738   |              |
|                                               | NFE2L2-Q4 vs NFE2L2-NoQ4                                      | NRF2-signalling                                                          | IBRAHIM_NRF2_UP                                                       | 232        | 0.5104008   | 1.8863534   | 0.0021598272 | 0.004589963  |
|                                               |                                                               |                                                                          | BIOCARTA_ARENRF2_PATHWAY                                              | 15         | 0.5700337   | 1.6469202   | 0.010638298  | 0.026081197  |
|                                               |                                                               |                                                                          | REACTOME_KEAP1_NFE2L2_PATHWAY                                         | 78         | 0.5533545   | 1.6898936   | 0.02455357   | 0.03298653   |
|                                               |                                                               |                                                                          | WP_NRF2ARE_REGULATION                                                 | 19         | 0.5487138   | 1.6037898   | 0.028747434  | 0.0284945    |
|                                               |                                                               |                                                                          | REACTOME_NUCLEAR_EVENTS_MEDIATED_BY_NFE2L2                            | 65         | 0.5592376   | 1.6717248   | 0.03539823   | 0.029416563  |
|                                               |                                                               | "Reactive oxygen species" signatures selected from "C2" module (MSigDB)  | GOBP_REGULATION_OF_REACTIVE_OXYGEN_SPECIES_METABOLIC_PROCESS          | 94         | 0.4241613   | 1.6679244   | 0.009195402  | 0.028278569  |
|                                               |                                                               |                                                                          | GOBP_REACTIVE_OXYGEN_SPECIES_BIOSYNTHETIC_PROCESS                     | 33         | 0.48617157  | 1.6144937   | 0.011111111  | 0.03406597   |
|                                               |                                                               |                                                                          | GOBP_REGULATION_OF_REACTIVE_OXYGEN_SPECIES_BIOSYNTHETIC_PROCESS       | 25         | 0.54969966  | 1.706309    | 0.013215859  | 0.04088131   |
|                                               |                                                               |                                                                          | GOBP_POSITIVE_REGULATION_OF_REACTIVE_OXYGEN_SPECIES_METABOLIC_PROCESS | 48         | 0.45550522  | 1.5888894   | 0.015452539  | 0.031796668  |
|                                               |                                                               |                                                                          | GOBP_CELLULAR_RESPONSE_TO_REACTIVE_OXYGEN_SPECIES                     | 89         | 0.3539509   | 1.4577864   | 0.021881837  | 0.05894144   |
|                                               |                                                               |                                                                          | REACTOME_DETOXIFICATION_OF_REACTIVE_OXYGEN_SPECIES                    | 25         | 0.5179814   | 1.5627236   | 0.02631579   | 0.030678552  |
|                                               |                                                               | "PI3K-AKT-MTOR" and "MAPK" signatures selected from "C2" module (MSigDB) | GOBP_REACTIVE_OXYGEN_SPECIES_METABOLIC_PROCESS                        | 141        | 0.34130841  | 1.4227666   | 0.046511628  | 0.057516515  |
|                                               |                                                               |                                                                          | PARENT_MTOR_SIGNALING_UP                                              | 277        | 0.3938268   | 1.7989123   | 0.0          | 0.015922444  |
|                                               |                                                               |                                                                          | REACTOME_MAPK_FAMILY_SIGNALING_CASCADES                               | 207        | 0.4126897   | 1.6954294   | 0.006756757  | 0.039081443  |
|                                               |                                                               |                                                                          | REACTOME_ONCOGENIC_MAPK_SIGNALING                                     | 47         | 0.44746003  | 1.5985909   | 0.01091703   | 0.02773023   |
|                                               |                                                               |                                                                          | BIOCARTA_MAPK_PATHWAY                                                 | 58         | 0.4388933   | 1.5999947   | 0.030237582  | 0.0409535    |
|                                               |                                                               |                                                                          | HALLMARK_PI3K_AKT_MTOR_SIGNALING                                      | 74         | 0.3950069   | 1.5217075   | 0.034802783  | 0.10181297   |
|                                               |                                                               |                                                                          | KEGG_MAPK_SIGNALING_PATHWAY                                           | 168        | 0.30408698  | 1.3644867   | 0.035799522  | 0.10343849   |
| "Glutathione" signatures selected from MSigDB |                                                               | WP_MAPK_SIGNALING_PATHWAY                                                | 159                                                                   | 0.31780806 | 1.3835868   | 0.040572792 | 0.11654138   |              |
|                                               |                                                               | GOBP_GLUTATHIONE_METABOLIC_PROCESS                                       | 28                                                                    | 0.48860592 | 1.5488015   | 0.036       | 0.0859133    |              |
| "Drug resistance" signatures (MSigDB)         | TOOKER_GEMCITABINE_RESISTANCE_DN                              | 73                                                                       | 0.44713596                                                            | 1.6085708  | 0.016161617 | 0.12756611  |              |              |
|                                               | KESHELAVA_MULTIPLE_DRUG_RESISTANCE                            | 31                                                                       | 0.4836802                                                             | 1.6323656  | 0.023809524 | 0.22686258  |              |              |
| T-ALL cohort from TARGET                      | NFE2L2 expression as a continuous                             | NRF2-signalling                                                          | IBRAHIM_NRF2_UP                                                       | 529        | 0.45389324  | 1.756569    | 0.024475524  | 0.056212034  |
|                                               |                                                               |                                                                          | IBRAHIM_NRF2_DOWN                                                     | 160        | -0.46884874 | -1.7939197  | 0.008658009  | 0.035859738  |
|                                               | PTEN-mutated vs PTEN-No mutated                               | NRF2-signalling                                                          | REACTOME_KEAP1_NFE2L2_PATHWAY                                         | 102        | 0.51239353  | 1.6889881   | 0.031512607  | 0.047934383  |
|                                               |                                                               |                                                                          | REACTOME_NUCLEAR_EVENTS_MEDIATED_BY_NFE2L2                            | 79         | 0.53290725  | 1.662422    | 0.044989776  | 0.02736938   |
|                                               | NFE2L2 expression as a continuous variable in PTEN-No mutated | "PI3K-AKT-MTOR" signatures selected from "C2" module (MSigDB)            | REACTOME_PI3K_CASCADE                                                 | 68         | 0.40828627  | 1.5837905   | 0.019264448  | 0.11048066   |

Supplementary Figure S1

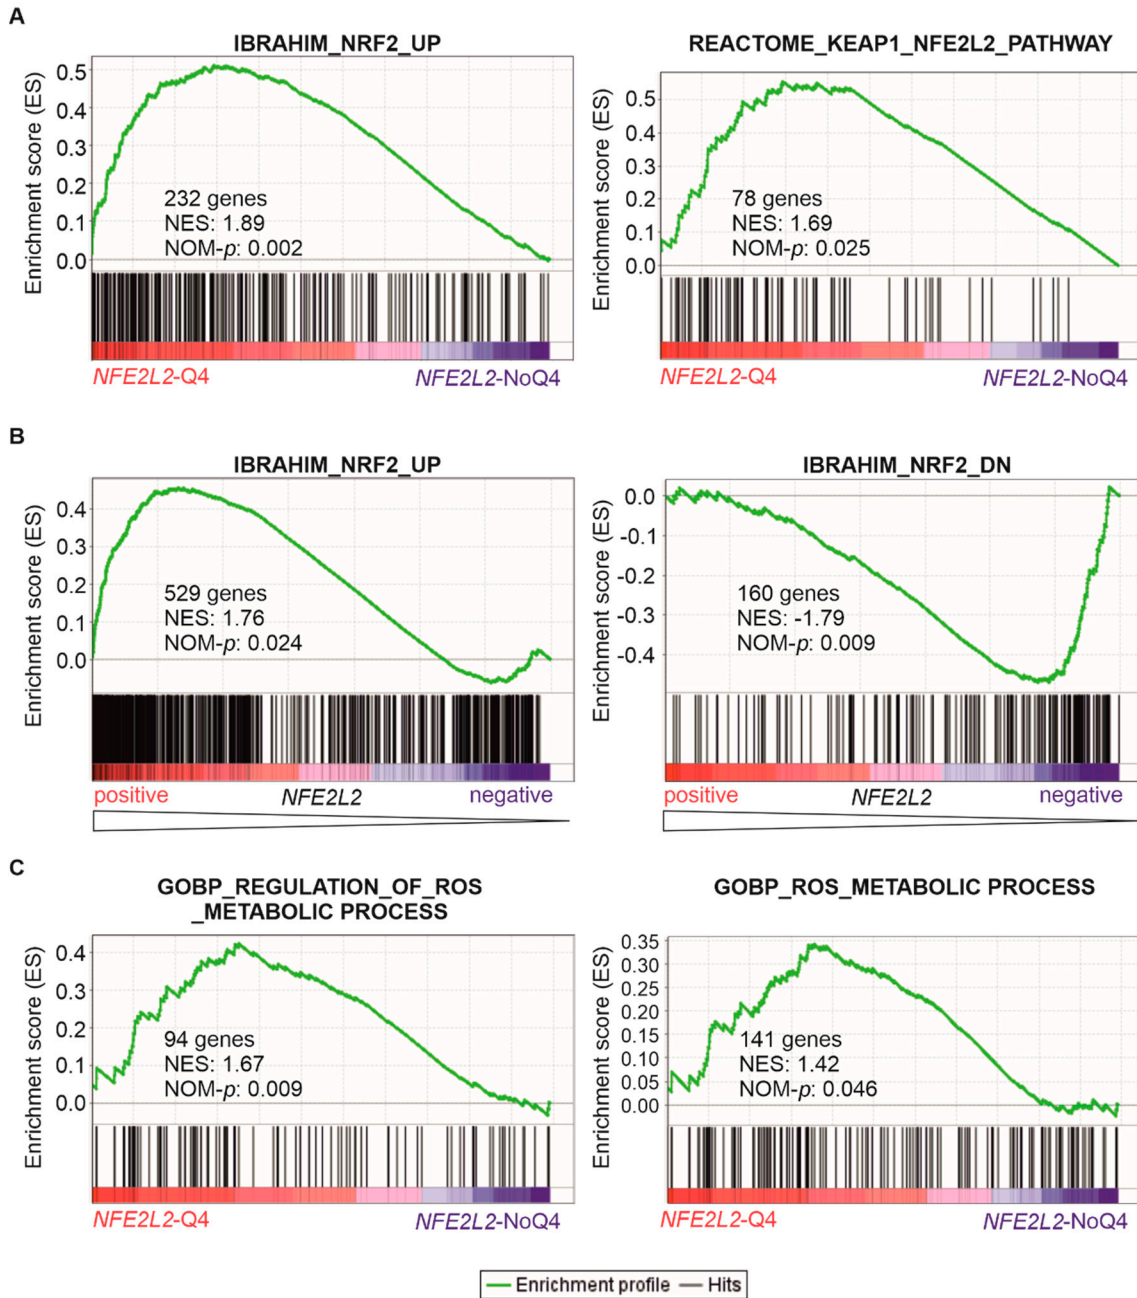

**Supplementary Figure S1. Genetic signatures of NRF2-induced transcriptional targets and signalling in T-ALL patients with high *NFE2L2* expression.** (A, C) Gene Set Enrichment Analysis (GSEA) was performed in 38 T-ALL patients with publicly available gene expression data [32], comparing patients belonging or not to the upper quartile of *NFE2L2* expression (*NFE2L2*-Q4 vs *NFE2L2*-NoQ4). (B) GSEA was performed in 264 T-ALL patients (TARGET cohort), based on their *NFE2L2* expression levels as a continuous variable. These signatures were selected from the Molecular Signatures Dabatase (MSigDB), and their systematic names are M42510 (IBRAHIM\_NRF2\_UP), M45021 (REACTOME\_KEAP1\_NFE2L2\_PATHWAY), M42513 (IBRAHIM\_NRF2\_DOWN), M13446 (GOBP\_REGULATION\_OF\_REACTIVE\_OXYGEN\_SPECIES\_METABOLIC\_PROCESS) and M15990 (GOBP\_REACTIVE\_OXYGEN\_SPECIES\_METABOLIC\_PROCESS). The green curve corresponds to the enrichment score (ES) curve, which is the running sum of the weighted score obtained with the GSEA software v4.2.1. ROS, Reactive Oxygen Species; NES, normalized enrichment score; NOM-*p*, nominal *p* value.

Supplementary Figure S2

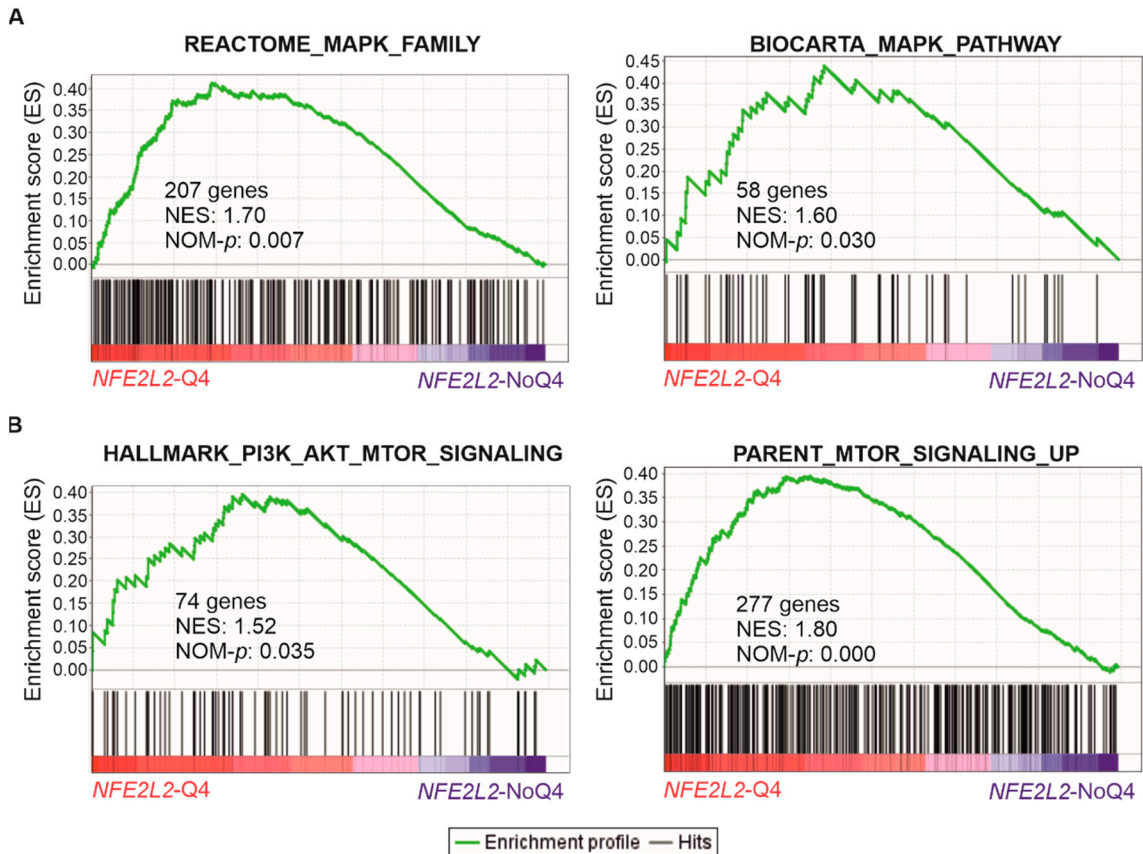

**Supplementary Figure S2. Association between high *NFE2L2* levels and MAPK-ERK and PI3K-AKT-mTOR oncogenic signalling in T-ALL.** Gene Set Enrichment Analysis was performed in 38 T-ALL patients with publicly available gene expression data [32], comparing patients belonging or not to the upper quartile of *NFE2L2* expression (*NFE2L2*-Q4 vs *NFE2L2*-NoQ4). **(A)** Two representative signatures for MAPK-ERK signalling pathway were selected from the Molecular Signatures Dabatase (MSigDB), and their systematic names are M27565 (REACTOME\_MAPK\_FAMILY\_SIGNALING\_CASCADES) and M13863 (BIOCARTA\_MAPK\_PATHWAY). **(B)** Two representative signatures for PI3K-AKT-mTOR signalling pathway were selected from the Molecular Signatures Dabatase (MSigDB), and their systematic names are M5923 (HALLMARK\_PI3K\_AKT\_MTOR\_SIGNALING) and M16909 (PARENT\_MTOR\_SIGNALING\_UP). The green curve corresponds to the enrichment score (ES) curve, which is the running sum of the weighted score obtained with the GSEA software v4.2.1. NES, normalized enrichment score; NOM-*p*, nominal *p* value.

### Supplementary Figure S3

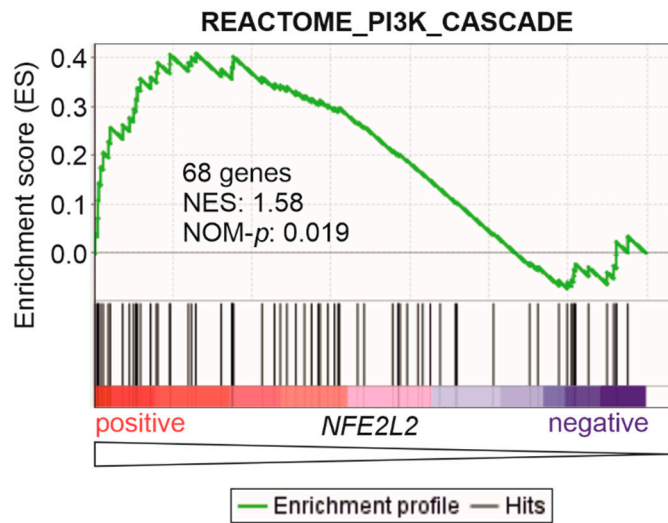

**Supplementary Figure S3. Association of PI3K-AKT-MTOR pathway to T-ALL patients with high *NFE2L2* expression, in absence of *PTEN* mutations.** Patients from the TARGET cohort not exhibiting loss-of-function *PTEN* mutations were selected (n=232) to perform Gene Set Enrichment Analysis (GSEA), based on their *NFE2L2* expression levels as a continuous variable. The REACTOME\_PI3K\_CASCADE signature (systematic name M16929) was selected from the Molecular Signatures Database (MSigDB). The green curve corresponds to the enrichment score (ES) curve, which is the running sum of the weighted score obtained with the GSEA software v4.2.1. ROS, Reactive Oxygen Species; NES, normalized enrichment score; NOM-*p*, nominal *p* value.

Supplementary Figure S4

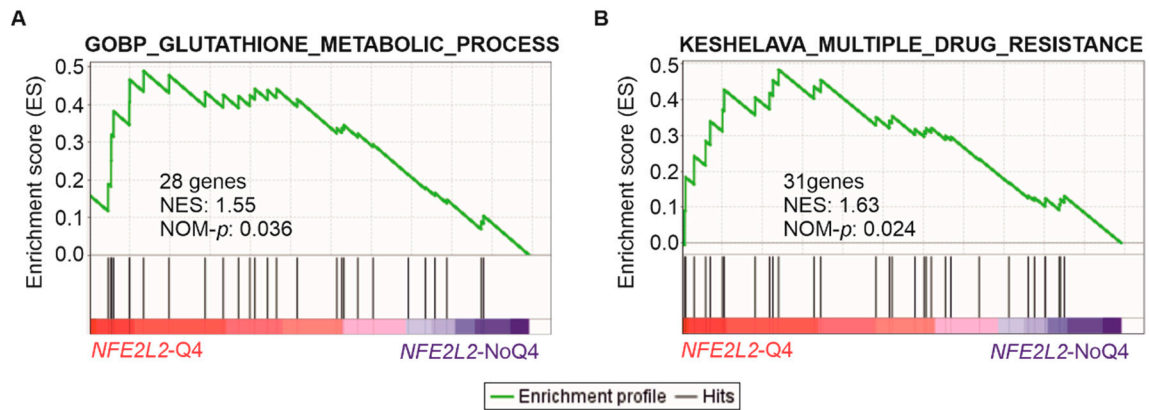

**Supplementary Figure S4. Genetic signatures of glutathione metabolism and drug resistance in T-ALL patients with high *NFE2L2* expression.** Gene Set Enrichment Analysis (GSEA) was performed in 38 T-ALL patients with publicly available gene expression data [32], comparing patients belonging or not to the upper quartile of *NFE2L2* expression (*NFE2L2*-Q4 vs *NFE2L2*-NoQ4). These signatures were selected from the Molecular Signatures Database (MSigDB), and their systematic names are M14708 (GOBP\_Glutathione\_Metabolic\_Process) and M12618 (KESHELAVA\_Multiple\_Drug\_Resistance). The green curve corresponds to the enrichment score (ES) curve, which is the running sum of the weighted score obtained with the GSEA software v4.2.1. NES, normalized enrichment score; NOM-*p*, nominal *p*-value.
